# Supplementary material for: CXCR1- or CXCR2-modified CAR T cells co-opt IL-8 for maximal antitumor efficacy in solid tumors
Source: PubMed Central journal article supplement (PMC6728370; doi:10.1038/s41467-019-11869-4), 2019-09-05
Supplement: 41467_2019_11869_MOESM1_ESM.pdf [file 41467_2019_11869_MOESM1_ESM.pdf]

## Supplementary Information

### **CXCR1- or CXCR2-Modified CAR T cells Co-opt IL-8 for Maximal Antitumor Efficacy in Solid Tumors**

Linchun Jin, et al

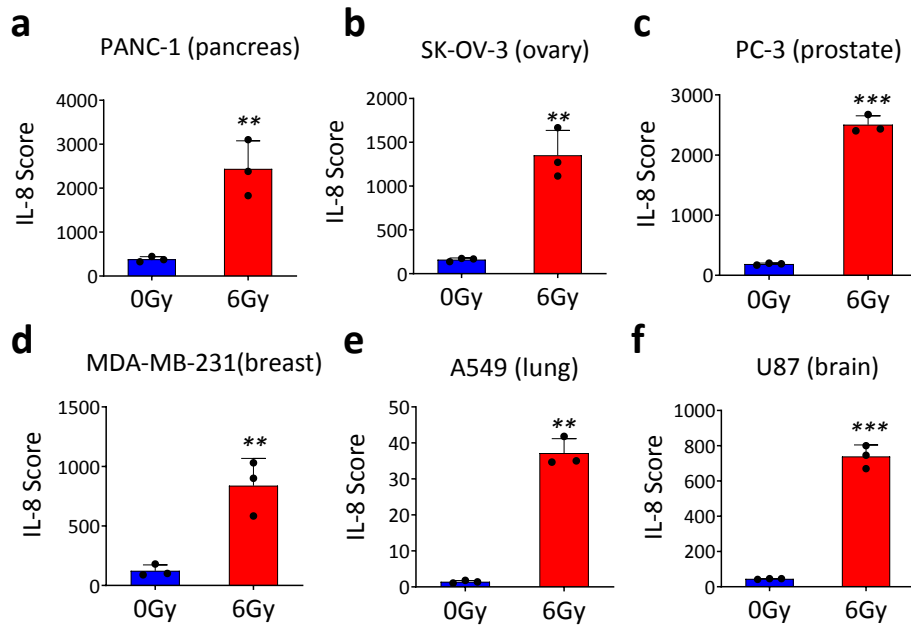

**Supplementary Fig. 1. Enhanced expression of IL-8 after exposure to ionizing radiation across multiple human cancer types. a-e.** IL-8 protein expression of multiple tumor cell lines 7 days after treatment with 6 Gy irradiation. Tumor cells were radiated at the indicated dose and seeded at  $1 \times 10^4$ /ml. The supernatant was harvested 7 days after radiation, and the IL-8 secretions (means  $\pm$  SD; n = 3) were measured by ELISA. The number of cells was determined using counting beads, and propidium iodide (PI) was used to gate viable cells. The IL-8 score represents a normalization of concentration to viable cells. The Mann–Whitney U test was used for the difference between 2 groups.

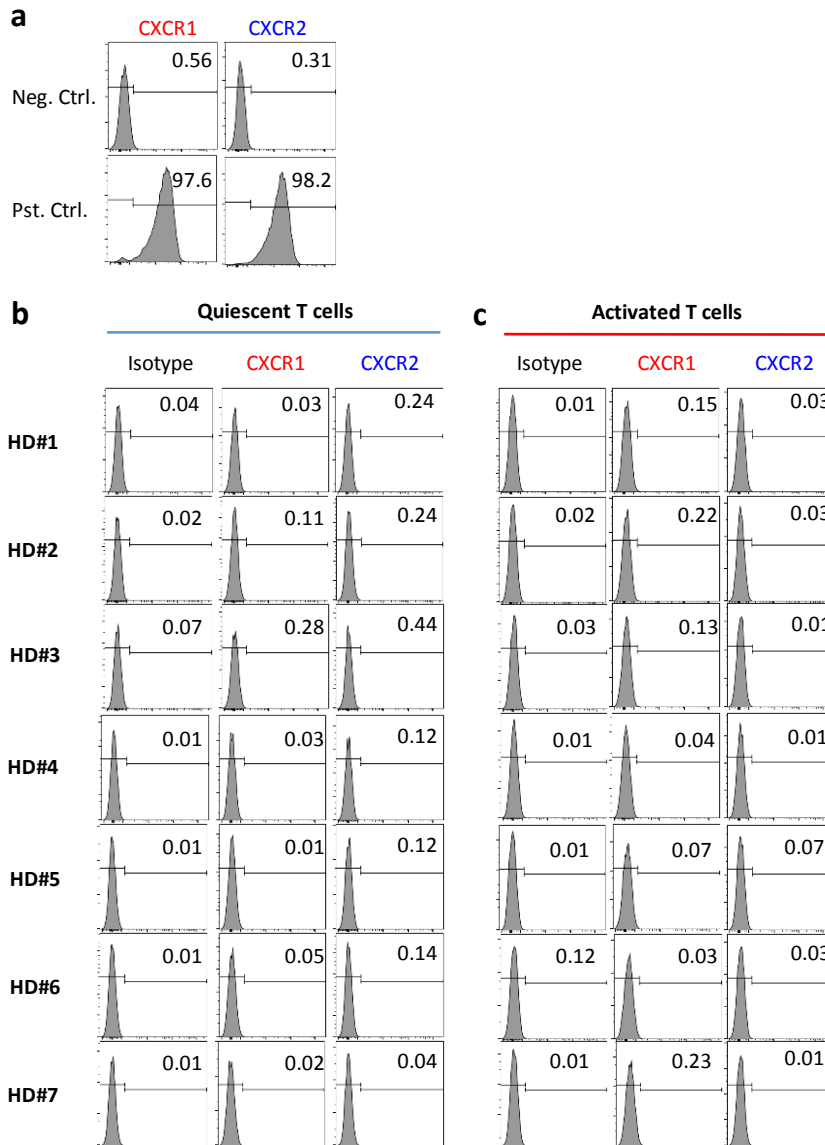

**Supplementary Fig. 2. No IL-8R expression was detected on human T cells. a-c.** Flow cytometric analysis of IL-8 receptor (CXCR1 and CXCR2) expressions on quiescent and activated T cells. PBMCs were isolated by Ficoll–Paque density gradient centrifugation from healthy donor buffy coat (n = 7) and activated with anti-CD3/CD28 Dynabeads (bead: cell = 3:1) in the presence of 100 IU/ml IL-2 for 10 days. CD3<sup>+</sup> and PI negative cells were gated, and CXCR1 and CXCR2 were evaluated by flow cytometry analysis. The Jurkat cell line was used as the negative control, and FACS-sorted CAR-R1 and CAR-R2 T cells were used as the positive control, whereas isotype control was included for gating.

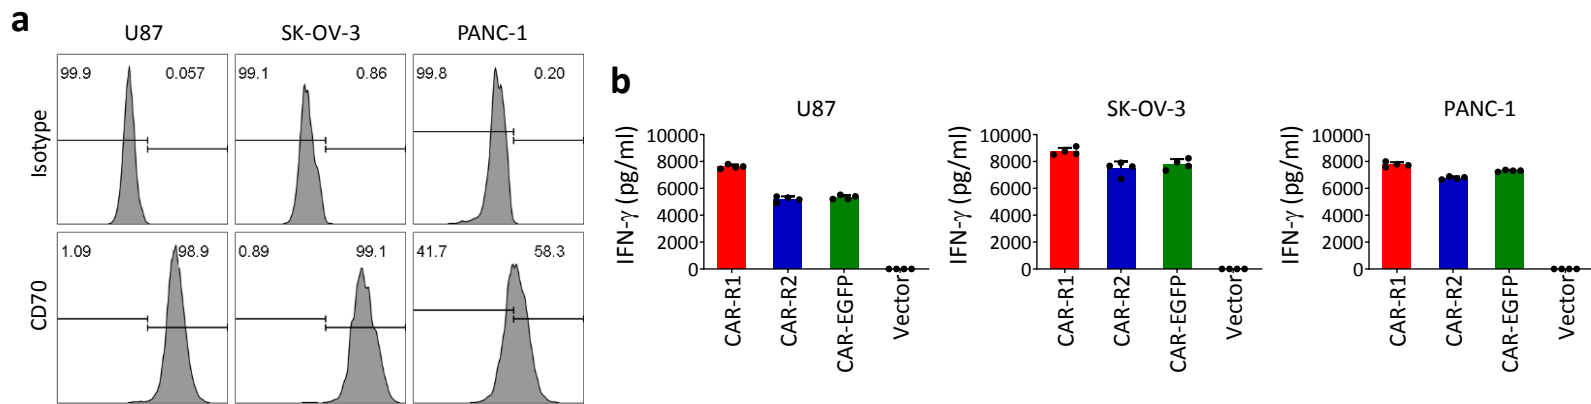

**Supplementary Fig 3. Comparable tumor recognition of the 8R-mod-70CARs and un-mod-70CAR T cells.** **a.** The expression level of CD70 on U87, SK-OV-3, and PANC-1 cell lines. Flow cytometry analysis was performed for the CD70 expression. The gates were drawn based on the isotype control. **b.** T cell recognition of the 8R-mod-70CARs and un-mod-70CAR T cells *in vitro*. The CAR T cells ( $1 \times 10^5$ ) were respectively cocultured with  $1 \times 10^5$  of U87, SK-OV-3, and PANC-1 tumor cells for overnight, and the supernatants were collected to assess IFN- $\gamma$  production, measured by ELISA. The data represent mean  $\pm$  SD and are representative of 3 independent experiments.

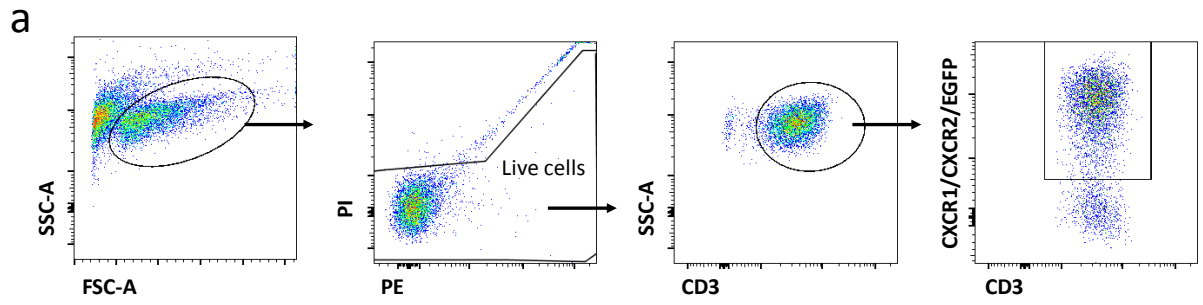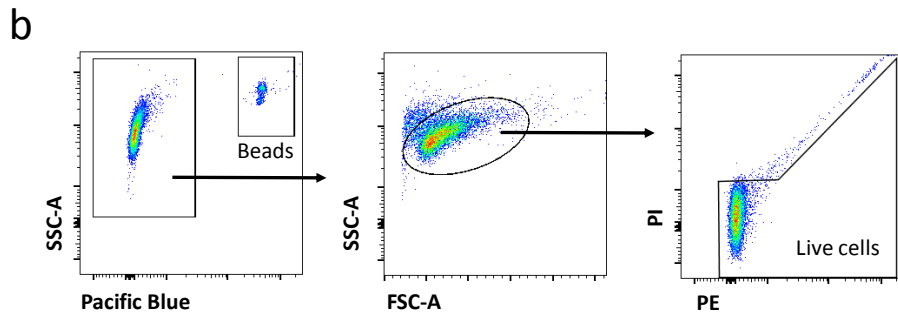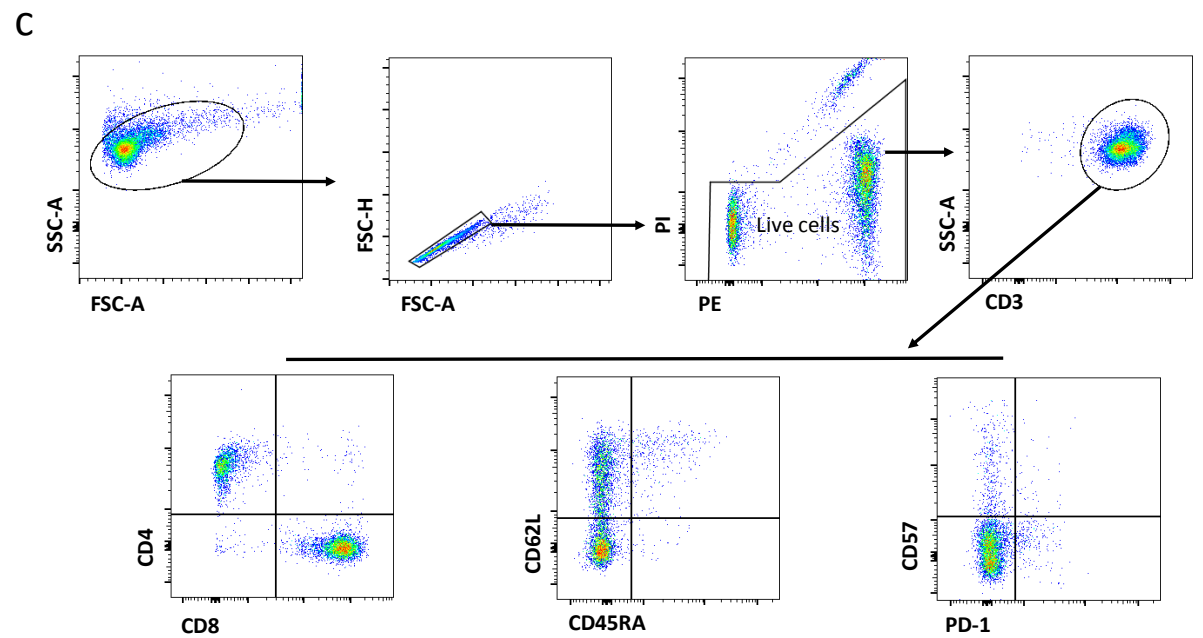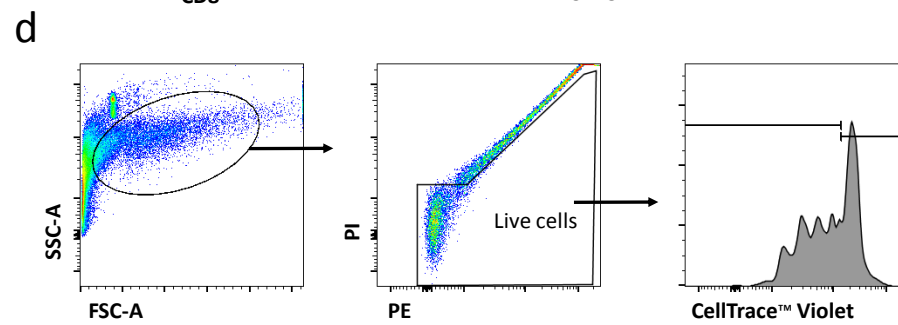

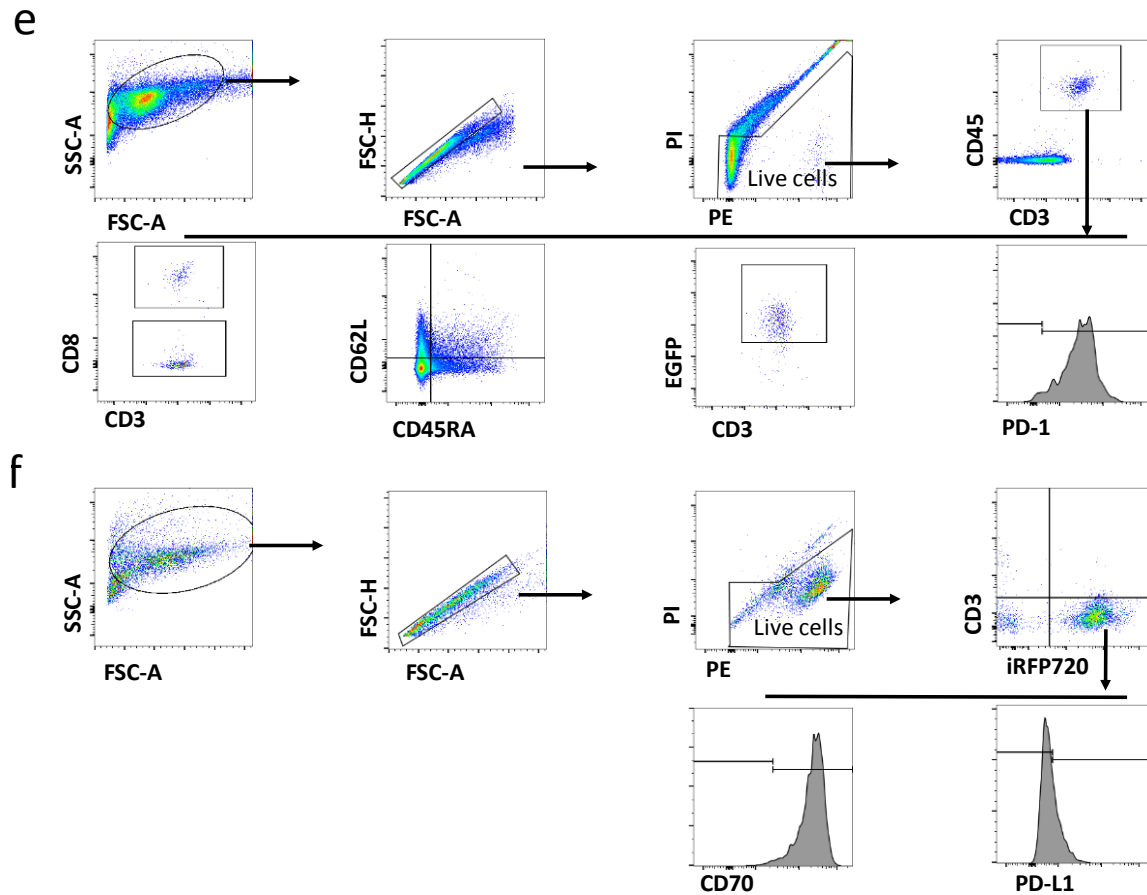

**Supplementary Fig. 4. Flow cytometry gating strategies used in Fig.2 and Fig. 5. a.** Gating strategies for analyzing T cell transduction efficiency of CAR-R1(CXCR1<sup>+</sup>), CAR-R2 (CXCR2<sup>+</sup>) and CAR-EGFP (EGFP<sup>+</sup>) T cells in **Fig. 2a**. **b.** Cell counts in **Fig. 2c** were measured by the flow cytometer using CountBright™ absolute counting beads. Beads were distinguished by fluorescence signal (Pacific blue<sup>+</sup>), and side scatter and live (PI<sup>-</sup>) cells were counted. **c.** Gating strategies to analyze CD4<sup>+</sup> T cell (CD4<sup>+</sup>CD8<sup>-</sup>), CD8<sup>+</sup>T cell (CD4<sup>-</sup>CD8<sup>+</sup>), naïve T cell (CD62L<sup>+</sup>CD45RA<sup>+</sup>), central memory T cell (CD62L<sup>+</sup>CD45RA<sup>-</sup>), effector memory T cell (CD62L<sup>-</sup>CD45RA<sup>-</sup>) and exhaustion markers (CD57<sup>+</sup>, PD-1<sup>+</sup>) in **Fig. 2d**. **d.** Cell proliferation was distinguished by fluorescent dye dilution on live (PI<sup>-</sup>) cells in **Fig. 2i**. **e.** T cells (CD3<sup>+</sup>CD45<sup>+</sup>) from tumor, spleen or before adoptive transfer were gated to analyze CD4<sup>+</sup>T cell (CD3<sup>+</sup>CD8<sup>-</sup>), CD8<sup>+</sup>T cell (CD3<sup>+</sup>CD8<sup>+</sup>) in **Fig. 5d**, , naïve T cell (CD62L<sup>+</sup>CD45RA<sup>+</sup>), central memory T cell (CD62L<sup>+</sup>CD45RA<sup>-</sup>), effector memory T cell (CD62L<sup>-</sup>CD45RA<sup>-</sup>), effector T cell (CD62L<sup>-</sup>CD45RA<sup>+</sup>) in **Fig. 5e**, CAR-EGFP T cell percentage (EGFP<sup>+</sup>) in **Fig. 5f**, and PD-1 expression on T cell in **Fig. 5g**. **f.** CD3<sup>+</sup>iRFP720<sup>+</sup> tumor cells are gated to analyze tumor CD70 in **Fig.5i** and PD-L1 expression in **Fig5j**.

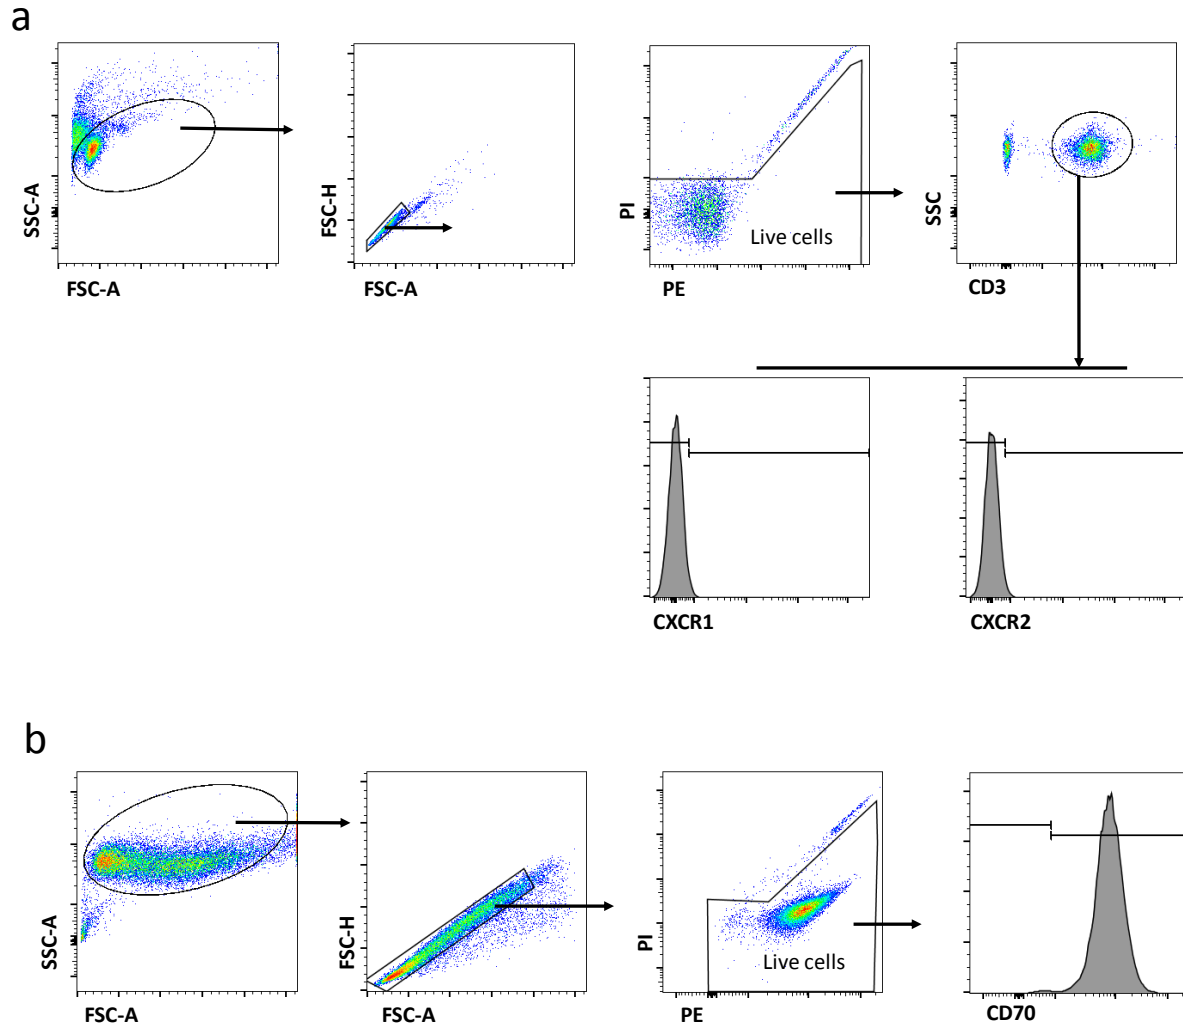

**Supplementary Fig. 5. Flow cytometry gating strategies used in the Supplementary Figures. a.** Gating strategies to analyze T cell CXCR1 or CXCR2 expression in **Supplementary Fig. 2. b.** Gating strategies to analyze tumor cell CD70 expression in **Supplementary Fig. 3.** The gate for CXCR1<sup>+</sup>, CXCR2<sup>+</sup> or CD70<sup>+</sup> cells was based on the isotype control.

**Supplementary Table 1.** Primers used in this study

| <b>Primer/Product</b>                                                                                | <b>Catalog#</b>                         | <b>Assay method</b> |
|------------------------------------------------------------------------------------------------------|-----------------------------------------|---------------------|
| Cytokines and chemokines (SAB Target List) H384, Predesigned 384-well panel for use with SYBR® Green | Bio-Rad(10034472)                       | SYBR® Green         |
| Human IL-8                                                                                           | ThermoFisher Scientific (Hs00174103_m1) | TaqMan®             |
| Human RPL13A                                                                                         | ThermoFisher Scientific (Hs01578912_m1) | TaqMan®             |



**Supplementary Table 2.** Antibodies used in this study

| <b>Antibodies</b>                                   | <b>Company</b> | <b>Catalog#</b> | <b>Application</b> | <b>Dilution</b> |
|-----------------------------------------------------|----------------|-----------------|--------------------|-----------------|
| BV421 Mouse Anti-Human CD3                          | BD Biosciences | 563798          | Flow               | 1:50            |
| APC Mouse Anti-Human CD181 (CXCR1)                  | BD Biosciences | 551080          | Flow               | 1:20            |
| PE Mouse Anti-Human CD182 (CXCR2)                   | BD Biosciences | 555933          | Flow               | 1:50            |
| APC-Cy <sup>TM</sup> 7 Mouse Anti-Human CD4         | BD Biosciences | 557871          | Flow               | 1:50            |
| PE Mouse Anti-Human CD8                             | BD Biosciences | 555635          | Flow               | 1:20            |
| APC Mouse Anti-Human CD62L                          | BD Biosciences | 561916          | Flow               | 1:50            |
| PE-Cy <sup>TM</sup> 7 Mouse Anti-Human CD45RA       | BD Biosciences | 561216          | Flow               | 1:50            |
| APC Mouse Anti-Human CD57                           | BD Biosciences | 560845          | Flow               | 1:50            |
| PE-Cy <sup>TM</sup> 7 Mouse anti-Human CD279 (PD-1) | BD Biosciences | 561272          | Flow               | 1:50            |
| APC-H7 Mouse Anti-Human CD3                         | BD Biosciences | 560176          | Flow               | 1:50            |
| APC Mouse Anti-Human CD4                            | BD Biosciences | 555349          | Flow               | 1:20            |
| BV421 Mouse Anti-Human CD45                         | BD Biosciences | 563879          | Flow               | 1:50            |
| PE Mouse Anti-Human CD70                            | BD Biosciences | 555835          | Flow               | 1:20            |
| APC Mouse Anti-Human CD274 (PD-L1)                  | BD Biosciences | 563741          | Flow               | 1:50            |

|                                     |                          |                  |                |              |
|-------------------------------------|--------------------------|------------------|----------------|--------------|
| FITC Mouse Anti-Human CD181 (CXCR1) | BD Biosciences           | 555939           | Flow           | 1:50         |
| FITC Mouse Anti-Human CD182 (CXCR2) | BD Biosciences           | 551126           | Flow           | 1:20         |
| Mouse Anti-Human IL-8               | BD Biosciences           | 554726           | Neutralization | 1:250        |
| Rabbit anti-human IL-8              | Abcam                    | ab7747           | IHC            | 1:50         |
| Goat anti-rabbit HRP polymer        | Vector Laboratories Inc. | MP-7451          | IHC            | Ready-to-use |
| Rat anti-human CD45                 | Thermo Fisher Scientific | MA5-17687        | IF             | 1:500        |
| Rabbit anti-human Granzyme B        | Abcam                    | ab134933         | IF             | 1:100        |
| Rabbit anti-human PD1               | Novus Biologicals        | NBP2-47621-0.5ML | IF             | 1:100        |
| Goat anti-rat IgG-Alexa Fluor488    | Thermo Fisher Scientific | A-11006          | IF             | 1:500        |
| Goat anti-rabbit IgG-HRP            | ThermoFisher Scientific  | B40922           | IF             | Ready-to-use |
